# Supplementary material for: Identification, Evaluation, and Management of Children With Autism Spectrum Disorder
Source: Oxford University Press journal article supplement (doi:10.1542/peds.2019-3447), 2019-12-16
Supplement: peds_20193447supplementarydata.pdf [file peds_20193447supplementarydata.pdf]

## Supplemental Information

**SUPPLEMENTAL TABLE 14** Recurrent CNVs Most Commonly Identified in Cohorts With ASD by Using CMA Analysis

| CNV Region                         | Frequency <sup>a</sup> | Common Clinical Features                                                                             |
|------------------------------------|------------------------|------------------------------------------------------------------------------------------------------|
| 16p11.2 deletion                   | 1 in 304               | ASD, DD or ID, expressive language impairment, relative or absolute macrocephaly, overweight         |
| 16p11.2 duplication                | 1 in 396               | ASD, schizophrenia, bipolar disorder, ADHD, relative or absolute microcephaly, underweight           |
| 15q11.2-q13 (BP2–BP3) duplication  | 1 in 494               | ASD, DD or ID, epilepsy, hypotonia, ataxia, behavior problems                                        |
| 15q13.2-q13.3 (BP4–BP5) deletion   | 1 in 659               | ASD, DD or ID, epilepsy, schizophrenia, cardiac defects                                              |
| 1q21.1 duplication                 | 1 in 659               | ASD, DD or ID, schizophrenia, ADHD, relative macrocephaly, hypertelorism                             |
| 22q11.2 duplication                | 1 in 659               | ASD, DD or ID, hypotonia, motor delay                                                                |
| 16p13.11 deletion                  | 1 in 791               | ASD, DD or ID, epilepsy, schizophrenia, congenital anomalies                                         |
| 7q11.23 duplication                | 1 in 989               | ASD, DD or ID, growth retardation, hypotonia                                                         |
| 16p12.2 deletion                   | 1 in 989               | ASD, DD or ID, schizophrenia, epilepsy, growth retardation, cardiac defects, microcephaly, hypotonia |
| 17q12 deletion                     | 1 in 1978              | ASD, DD or ID, schizophrenia, renal cysts, mature-onset diabetes of the young type 5                 |
| 15q13.2–13.3 (BP4–BP5) duplication | 1 in 1978              | ASD, DD or ID, obesity                                                                               |

BP2 breakpoint 2; BP3 breakpoint 3; BP4 breakpoint 4; BP5 breakpoint 5; DD developmental delay; ID intellectual disability.

<sup>a</sup> Moreno-De-Luca D et al<sup>651</sup>; the frequency of each CNV among 3955 probands with ASD from the Autism Genetic Resource Exchange, Autism Genome Project, and Simons Foundation Autism Research Initiative Simplex Collection cohorts.

**SUPPLEMENTAL TABLE 13** Selected Genetic Syndromes Associated With ASD

| Condition                                                                                             | Physical Findings                                                                                                                                                                                                      | Gene                                                     | Confirmatory Testing                                                                                                                                     | Importance                                                                                                                                                                                                                                                                                                                                                                                                                                          |
|-------------------------------------------------------------------------------------------------------|------------------------------------------------------------------------------------------------------------------------------------------------------------------------------------------------------------------------|----------------------------------------------------------|----------------------------------------------------------------------------------------------------------------------------------------------------------|-----------------------------------------------------------------------------------------------------------------------------------------------------------------------------------------------------------------------------------------------------------------------------------------------------------------------------------------------------------------------------------------------------------------------------------------------------|
| Fragile X syndrome                                                                                    | Long face, prominent forehead and jaw, large ears, joint laxity, macroorchidism after puberty in boys                                                                                                                  | <i>FMR1</i> (CGG repeat expansion, abnormal methylation) | Targeted mutation analysis (PCR and Southern blot)                                                                                                       | Genetic counseling (X-linked dominant inheritance); all mothers of individuals with an <i>FMR1</i> full mutation are carriers of an <i>FMR1</i> premutation or full mutation; extended family counseling is necessary; premutation carriers are at risk for fragile X–associated tremor/ataxia syndrome and <i>FMR1</i> -related primary ovarian insufficiency in female patients; several targeted pharmacologic therapies are under investigation |
| Neurofibromatosis 1                                                                                   | Multiple café-au-lait macules, axillary and inguinal freckling, iris Lisch nodules, cutaneous neurofibromas                                                                                                            | <i>NF1</i>                                               | Clinical criteria; optimized protein truncation testing, sequence analysis, and deletion or duplication analysis are available but infrequently required | Genetic counseling (autosomal dominant inheritance); 50% de novo, 50% inherited; associated problems requiring investigation or monitoring (optic gliomas, other CNS tumors, peripheral nerve sheath tumors, vasculopathy, hypertension, orthopedic issues, osteopenia)                                                                                                                                                                             |
| <i>PTEN</i> hamartoma tumor syndrome (includes Cowden syndrome and Bannayan-Riley-Ruvalcaba syndrome) | Marked macrocephaly, skin hamartomas, pigmented macules of the glans penis                                                                                                                                             | <i>PTEN</i>                                              | <i>PTEN</i> sequence analysis, deletion or duplication analysis                                                                                          | Genetic counseling (autosomal dominant inheritance with highly variable expression); associated problems requiring investigation or monitoring (significant risk of benign and malignant tumors of the thyroid, breast, and endometrium as well as intestinal polyps, colorectal cancer, renal cell carcinoma, cutaneous melanoma, and cerebellar dysplastic gangliocytoma)                                                                         |
| Rett syndrome                                                                                         | Deceleration of head growth velocity, acquired microcephaly, loss of purposeful hand use, prominent hand stereotypies (especially hand wringing or clasping), apraxia, hyperventilation or breath-holding, seizures    | <i>MECP2</i>                                             | <i>MECP2</i> sequence analysis, deletion or duplication analysis                                                                                         | Genetic counseling (>99% de novo, <1% germline mosaicism); associated problems requiring investigation or monitoring and anticipatory guidance (failure to thrive, gastroesophageal reflux, respiratory problems, osteopenia, sudden death); targeted pharmacologic therapy under investigation                                                                                                                                                     |
| Smith-Lemli-Opitz syndrome                                                                            | Characteristic facial features (narrow forehead, low-set ears, ptosis, epicanthal folds, short nose, anteverted nares), microcephaly, cleft palate, 2- to 3-toe syndactyly, postaxial polydactyly, hypospadias in male | <i>DHCR7</i>                                             | 7-dehydrocholesterol level (elevated); <i>DHCR7</i> sequence analysis available                                                                          | Genetic counseling (autosomal recessive inheritance); potential role for treatment with cholesterol                                                                                                                                                                                                                                                                                                                                                 |

**SUPPLEMENTAL TABLE 13** Continued

| Condition          | Physical Findings                                                                                                                                                                                                                                                                                                                                                                                                                                          | Gene              | Confirmatory Testing                                                            | Importance                                                                                                                                                                                                                                                                       |
|--------------------|------------------------------------------------------------------------------------------------------------------------------------------------------------------------------------------------------------------------------------------------------------------------------------------------------------------------------------------------------------------------------------------------------------------------------------------------------------|-------------------|---------------------------------------------------------------------------------|----------------------------------------------------------------------------------------------------------------------------------------------------------------------------------------------------------------------------------------------------------------------------------|
| Timothy syndrome   | <p>patients, prenatal and postnatal growth retardation</p> <p>Long QT interval, other ECG abnormalities (atrioventricular block, macroscopic T-wave alternans), congenital heart defects, cutaneous syndactyly, low-set ears, flat nasal bridge, thin upper lip, round facies, baldness for the first 2 y of life followed by thin scalp hair, dental abnormalities, frequent infections because of altered immune response, intermittent hypoglycemia</p> | <i>CACNA1C</i>    | Targeted mutation analysis, sequence analysis, deletion or duplication analysis | Genetic counseling, autosomal dominant, usually de novo, but parental germline mosaicism has been observed; treatment related to long QTc ( $\beta$ -blocker, pacemaker; implantable defibrillator) and avoidance of hypoglycemia                                                |
| Tuberous sclerosis | <p>Hypopigmented macules, angiofibromas, shagreen patches (connective tissue nevi), ungual fibromas, retinal hamartomas</p>                                                                                                                                                                                                                                                                                                                                | <i>TSC1, TSC2</i> | Clinical criteria; <i>TSC1</i> and <i>TSC2</i> sequencing available             | Genetic counseling (autosomal dominant inheritance); associated problems requiring investigation or monitoring (CNS tumors, seizures, renal angiomyolipomas or cysts, cardiac rhabdomyomas and arrhythmias); potential role for targeted pharmacologic therapy (mTOR inhibitors) |

*CACNA1C*, calcium channel, voltage-dependent, L-type,  $\alpha$ -1c subunit; C6G, cytosine-guanine-guanine; CNS, central nervous system; *DHCR7*, 7-dehydrocholesterol reductase; ECG, electrocardiogram; *FMR1*, fragile X mental retardation 1; *MECP2*, methyl CpG binding protein 2; mTOR, mammalian target of rapamycin; PCR, polymerase chain reaction; *PTEM*, phosphatase and tensin homolog; QTc, corrected QT interval; *TSC1*, tuberous sclerosis 1; *TSC2*, tuberous sclerosis 2. Adapted with permission from Myers SM, Challman TD. Autism Spectrum Disorders. In: Voigt RG, Macias MM, Myers SM, eds. *Developmental and Behavioral Pediatrics*. Elk Grove Village, IL: American Academy of Pediatrics; 2011:249–291.

**SUPPLEMENTAL TABLE 15** Selected ASD Risk Genes Identified or Confirmed in Whole-Exome Studies

| Gene                    | Gene Name                                                         | Broad Functional Categorization                                                                                                                            |                                                                                        |
|-------------------------|-------------------------------------------------------------------|------------------------------------------------------------------------------------------------------------------------------------------------------------|----------------------------------------------------------------------------------------|
| <i>SCN2A</i>            | sodium channel, voltage-gated, type II, $\alpha$ subunit          | Synaptic functions (eg, ion channels, neurotransmitter receptors, cell adhesion molecules, microtubule assembly, scaffolding proteins, actin cytoskeleton) |                                                                                        |
| <i>GRIN2B</i>           | glutamate receptor, ionotropic, N-methyl-D-aspartate 2B           |                                                                                                                                                            |                                                                                        |
| <i>KATNAL2</i>          | katanin p60 subunit A-like 2                                      |                                                                                                                                                            |                                                                                        |
| <i>ANK2</i>             | ankyrin 2, neuronal                                               |                                                                                                                                                            |                                                                                        |
| <i>DSCAM</i>            | Down syndrome cell adhesion molecule                              |                                                                                                                                                            |                                                                                        |
| <i>NRXN1</i>            | neurexin 1                                                        |                                                                                                                                                            |                                                                                        |
| <i>SHANK2</i>           | SH3 and multiple ankyrin repeat domains 2                         |                                                                                                                                                            |                                                                                        |
| <i>SHANK3</i>           | SH3 and multiple ankyrin repeat domains 3                         |                                                                                                                                                            |                                                                                        |
| <i>PTEN</i>             | phosphatase and tensin homolog                                    |                                                                                                                                                            | Intracellular signaling, activity-dependent synaptic protein synthesis and degradation |
| <i>SYNGAP1</i>          | synaptic Ras GTPase activating protein 1                          |                                                                                                                                                            |                                                                                        |
| <i>DYRK1A</i>           | dual-specificity tyrosine-(Y)-phosphorylation regulated kinase 1A |                                                                                                                                                            |                                                                                        |
| <i>POGZ</i>             | pogo transposable element with ZNF domain                         |                                                                                                                                                            |                                                                                        |
| <i>CUL3</i>             | cullin 3                                                          |                                                                                                                                                            |                                                                                        |
| <i>CHD2</i>             | chromodomain helicase DNA binding protein 2                       | Transcription regulation, chromatin remodeling                                                                                                             |                                                                                        |
| <i>CHD8</i>             | chromodomain helicase DNA binding protein 8                       |                                                                                                                                                            |                                                                                        |
| <i>ADNP<sup>a</sup></i> | activity-dependent neuroprotector homeobox                        |                                                                                                                                                            |                                                                                        |
| <i>ARID1B</i>           | AT rich interactive domain 1B (SWI1-like)                         |                                                                                                                                                            |                                                                                        |
| <i>ASH1L</i>            | ASH1 (absent, small, or homeotic)-like                            |                                                                                                                                                            |                                                                                        |
| <i>KDM5B</i>            | lysine-specific demethylase 5B                                    |                                                                                                                                                            |                                                                                        |
| <i>KMT2C</i>            | lysine-specific methyltransferase 2C                              |                                                                                                                                                            |                                                                                        |
| <i>SETD5</i>            | SET domain containing 5                                           |                                                                                                                                                            |                                                                                        |
| <i>TBR1</i>             | T-box, brain, 1                                                   |                                                                                                                                                            |                                                                                        |

Based on de novo loss of function variants and small de novo deletions (false discovery rate < 0.01). Adapted from Sanders SJ, He X, Willsey AJ, et al; Autism Sequencing Consortium. Insights into autism spectrum disorder genomic architecture and biology from 71 risk loci. *Neuron*. 2015;87(6):1215–1233; Krumm N, O’Roak BJ, Shendure J, Eichler EE. A de novo convergence of autism genetics and molecular neuroscience. *Trends Neurosci*. 2014;37(2):95–105; Brandler WM, Sebat J. From de novo mutations to personalized therapeutic interventions in autism. *Annu Rev Med*. 2015;66:487–507; De Rubeis S, He X, Goldberg AP, et al; DDD Study; Homozygosity Mapping Collaborative for Autism; UK10K Consortium. Synaptic, transcriptional and chromatin genes disrupted in autism. *Nature*. 2014;515(7526):209–215; Bourgeron T. From the genetic architecture to synaptic plasticity in autism spectrum disorder. *Nat Rev Neurosci*. 2015;16(9):551–563; and Sanders SJ, Murtha MT, Gupta AR, et al. De novo mutations revealed by whole-exome sequencing are strongly associated with autism. *Nature*. 2012; 485(7397):237–241.

<sup>a</sup> Also involved in microtubule dynamics at the synapse.

**SUPPLEMENTAL TABLE 16** Selected Metabolic Conditions That May (Rarely) Be Associated With an ASD Phenotype

---

|                                                                        |
|------------------------------------------------------------------------|
| Disorders of amino acid metabolism                                     |
| Phenylketonuria (untreated)                                            |
| Homocystinuria                                                         |
| Branched-chain ketoacid dehydrogenase kinase deficiency                |
| Disorders of $\gamma$ -aminobutyric acid metabolism                    |
| Succinic semialdehyde dehydrogenase deficiency                         |
| Disorders of cholesterol metabolism                                    |
| Smith-Lemli-Opitz syndrome (7-dehydrocholesterol reductase deficiency) |
| Disorders associated with cerebral folate deficiency                   |
| Folate receptor 1 gene mutations                                       |
| Dihydrofolate reductase deficiency                                     |
| Disorders of creatine transport or metabolism                          |
| Arginine-glycine amidinotransferase deficiency                         |
| Guanidinoacetate methyltransferase deficiency                          |
| X-linked creatine transporter deficits                                 |
| Disorders of carnitine biosynthesis                                    |
| 6-N-trimethyllysine dioxygenase deficiency                             |
| Disorders of purine and pyrimidine metabolism                          |
| Adenylosuccinate lyase deficiency                                      |
| Adenosine deaminase deficiency                                         |
| Cytosolic 5'-nucleotidase superactivity                                |
| Dihydropyrimidine dehydrogenase deficiency                             |
| Phosphoribosyl pyrophosphate synthetase superactivity                  |
| Lysosomal storage disorders                                            |
| Sanfilippo syndrome (mucopolysaccharidosis type III)                   |
| Mitochondrial disorders                                                |
| Mitochondrial DNA mutations                                            |
| Nuclear DNA mutations                                                  |
| Others                                                                 |
| Biotinidase deficiency                                                 |
| Urea cycle defects                                                     |

---

Adapted from Schaefer GB, Mendelsohn NJ. Professional Practice and Guidelines Committee. Clinical genetics evaluation in identifying the etiology of autism spectrum disorders: 2013 guideline revisions. *Genet Med*. 2013;15(5):399–407; Legido A, Jethva R, Goldenthal MJ. Mitochondrial dysfunction in autism. *Semin Pediatr Neurol*. 2013;20(3):163–175; Jiang YH, Wang Y, Xiu X, Choy KW, Pursley AN, Cheung SW. Genetic diagnosis of autism spectrum disorders: the opportunity and challenge in the genomics era. *Crit Rev Clin Lab Sci*. 2014;51(5):249–262; and Frye RE. Metabolic and mitochondrial disorders associated with epilepsy in children with autism spectrum disorder. *Epilepsy Behav*. 2015; 47:147–157.

**SUPPLEMENTAL REFERENCES**

- |                                                                                                                                                                                                            |
|------------------------------------------------------------------------------------------------------------------------------------------------------------------------------------------------------------|
| 631. Moreno-De-Luca D, Sanders SJ, Willsey AJ, et al. Using large clinical data sets to infer pathogenicity for rare copy number variants in autism cohorts. <i>Mol Psychiatry</i> . 2013;18(10):1090–1095 |
|------------------------------------------------------------------------------------------------------------------------------------------------------------------------------------------------------------|
